# Supplementary material for: Hsp90B enhances MAST1-mediated cisplatin resistance by protecting MAST1 from proteosomal degradation
Source: JCI journal article supplement (doi:10.1172/jci125963), 2019-08-25
Supplement: sd1 [file 1]

Hsp90B enhances MAST1-mediated cisplatin resistance by protecting MAST1 from proteosomal degradation  
*Pan et al.*

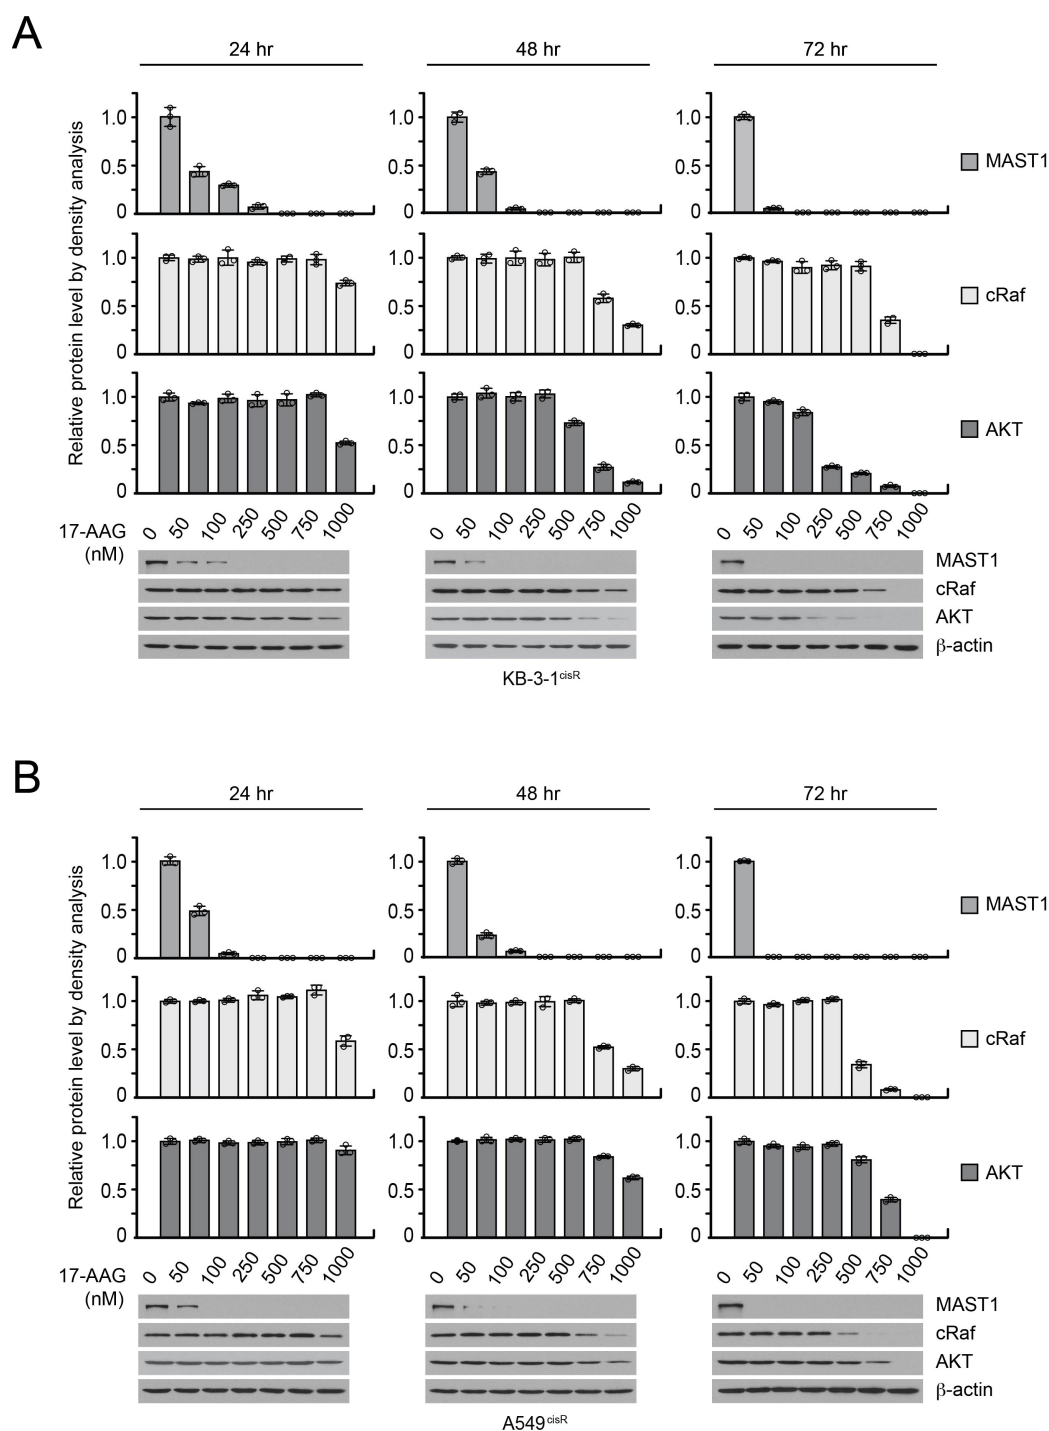

**Supplemental Figure 1. MAST1 is more susceptible than cRaf or AKT to degradation by 17-AAG in cisplatin-resistant cancer cells.** KB-3-1<sup>cisR</sup> (A) and A549<sup>cisR</sup> (B) cells were treated with 17-AAG at the indicated concentrations and time prior to immunoblotting. Protein levels were determined by densitometry analysis. Data are mean  $\pm$  SD from three technical replicates and representative of two independent biological experiments.

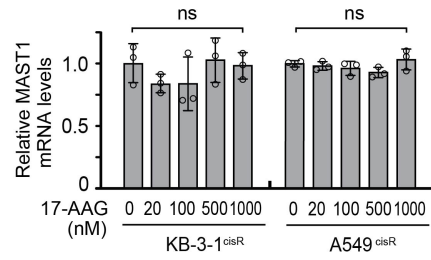

**Supplemental Figure 2. Hsp90 inhibition does not alter MAST1 gene expression in cisplatin-resistant cancer cells.** KB-3-1<sup>cisR</sup> and A549<sup>cisR</sup> cells were treated with increasing concentrations of 17-AAG for 24 h. MAST1 mRNA level was determined by quantitative RT-PCR. Data are mean  $\pm$  SD from three technical replicates and representative of three independent biological experiments. Statistical analysis was performed by 1-way ANOVA.

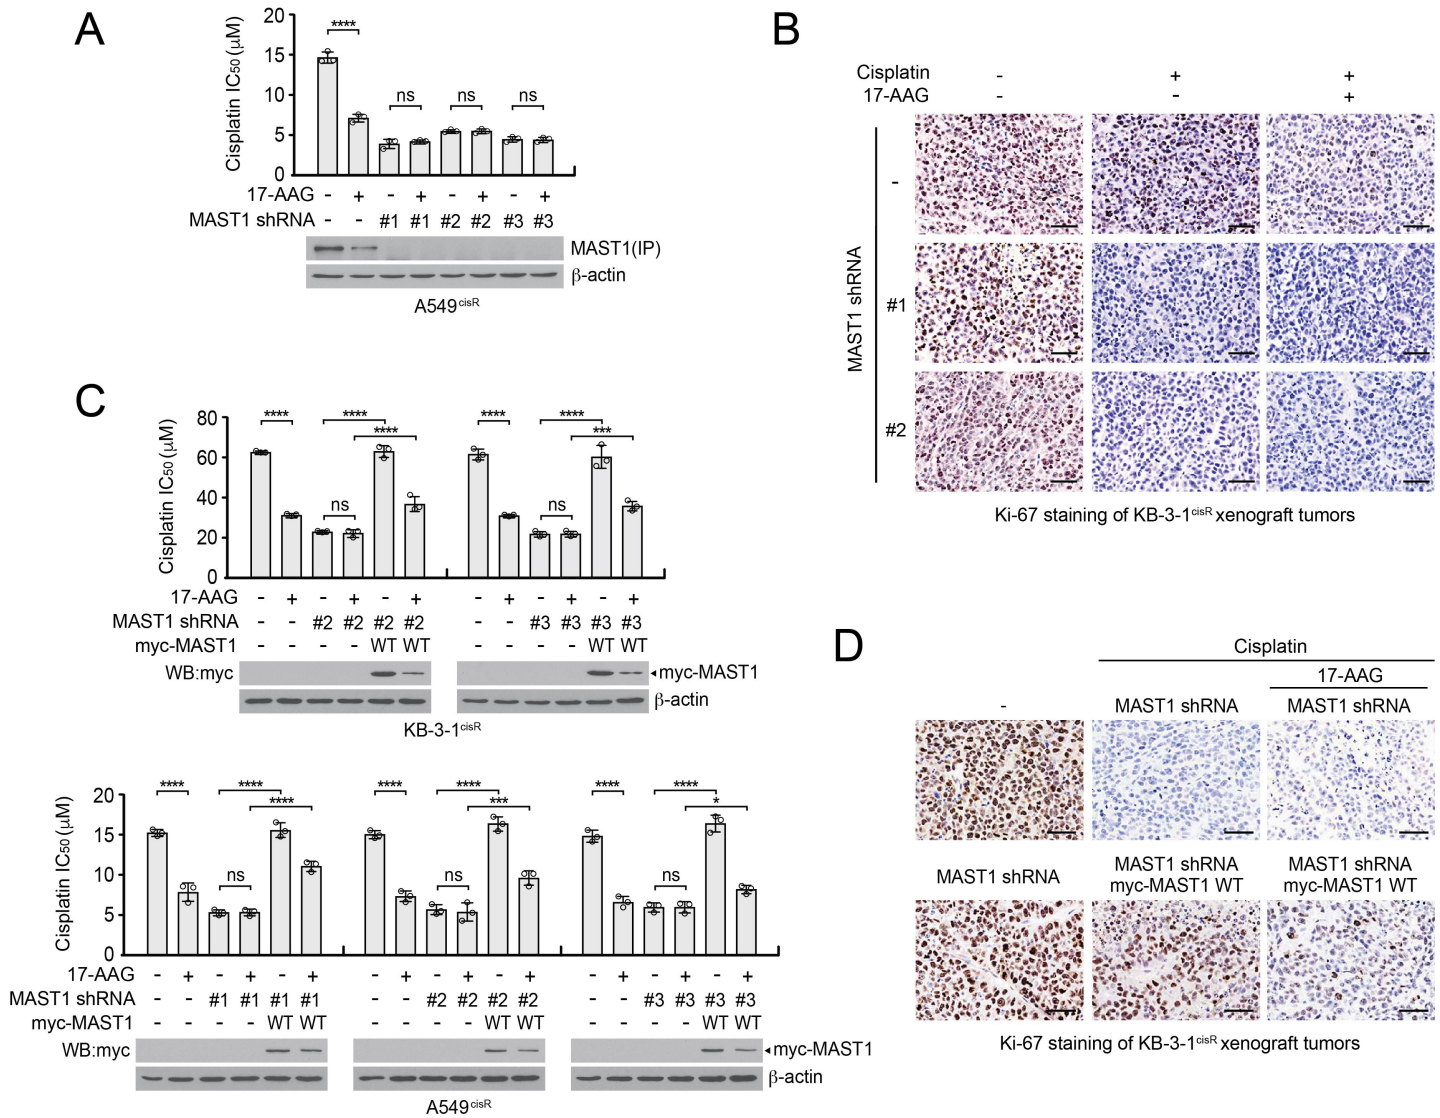

**Supplemental Figure 3. 17-AAG treatment sensitizes cisplatin-resistant cancer cells to cisplatin through MAST1.** (A) Cisplatin IC<sub>50</sub> upon 17-AAG treatment with or without MAST1 knockdown in A549<sup>cisR</sup> cells. Cisplatin IC<sub>50</sub> values were determined by CellTiter-Glo assay. (C) Cisplatin IC<sub>50</sub> upon 17-AAG treatment, MAST1 knockdown, and rescue expression of MAST1 WT. Three different shRNA clones were used for MAST1 knockdown. (B and D) Effect of 17-AAG treatment and MAST1 knockdown (B), and knockdown and rescue expression of MAST1 WT (D) on tumor proliferation was assessed by Ki-67 immunohistochemistry (IHC) staining. Scale bars represent 50 μm. Data shown are representative of three (A and C) and two (B and D) independent biological experiments. Data are mean ± SD from three technical replicates. Statistical analysis was performed by 1-way ANOVA (\**P*<0.05; \*\*\**P*<0.005; \*\*\*\**P*<0.0001).

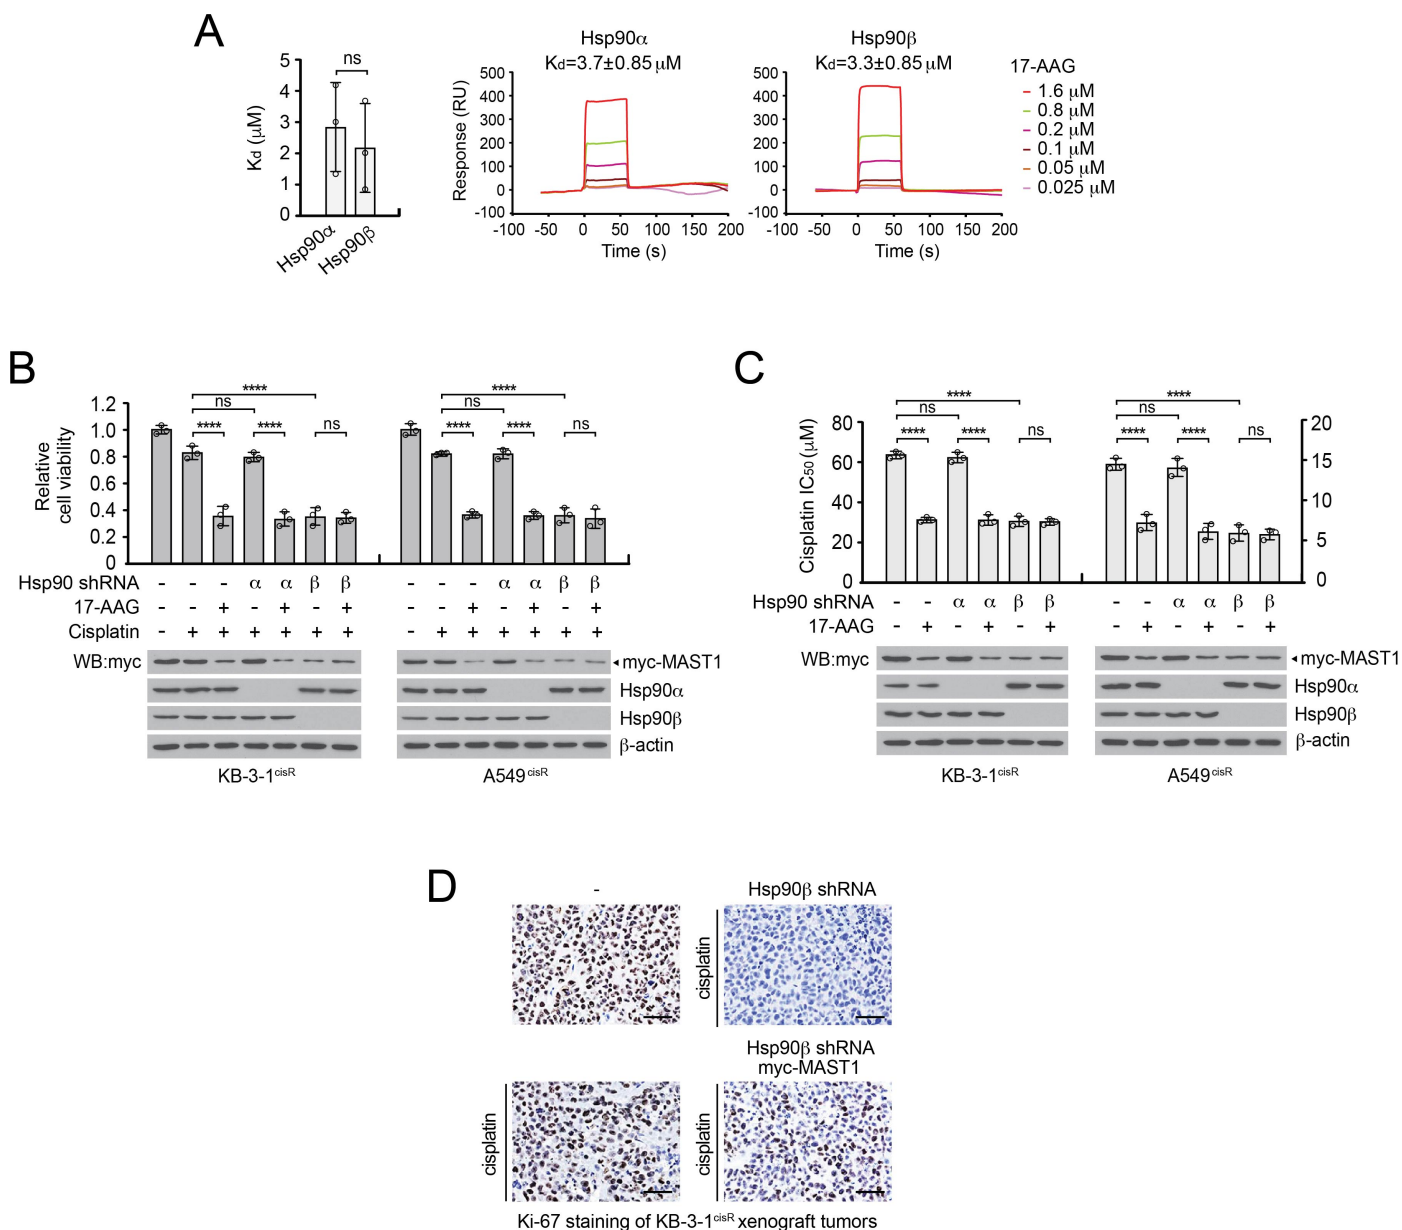

**Supplemental Figure 4. Hsp90B stabilizes MAST1 and contributes to cisplatin resistance. (A)** Interactions between hsp90 isoforms and 17-AAG were determined by Biacore SPR. **(B-C)** Effect of 17-AAG on MAST1 protein level, cell viability, and cisplatin response in cells with hsp90A or hsp90B knockdown. KB-3-1<sup>cisR</sup> and A549<sup>cisR</sup> cells with hsp90A or hsp90B knockdown were treated with 17-AAG (100 nM) in the presence of sublethal doses of cisplatin (KB-3-1<sup>cisR</sup>: 5  $\mu\text{g}/\text{ml}$ , A549<sup>cisR</sup>: 2  $\mu\text{g}/\text{ml}$ ). **(D)** Effect of hsp90B knockdown and MAST1 overexpression on tumor proliferation. Scale bars represent 50  $\mu\text{m}$ . Data shown are representative of three (A-C) and two (D) independent biological experiments. Data are mean  $\pm$  SD from three technical replicates. Statistical analysis was performed by 1-way ANOVA (\*\*\*\* $P < 0.0001$ ).

**A**

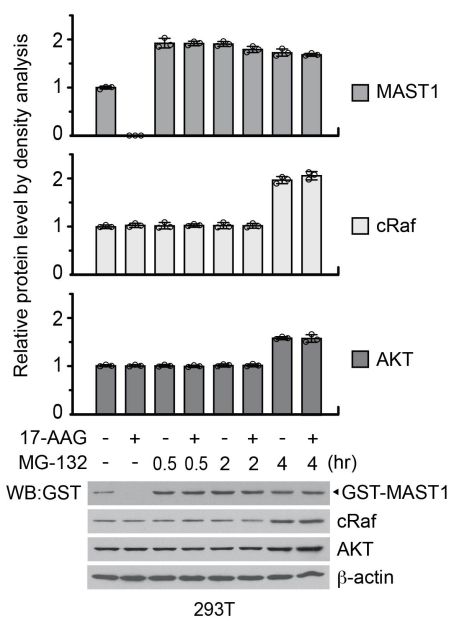

**B**

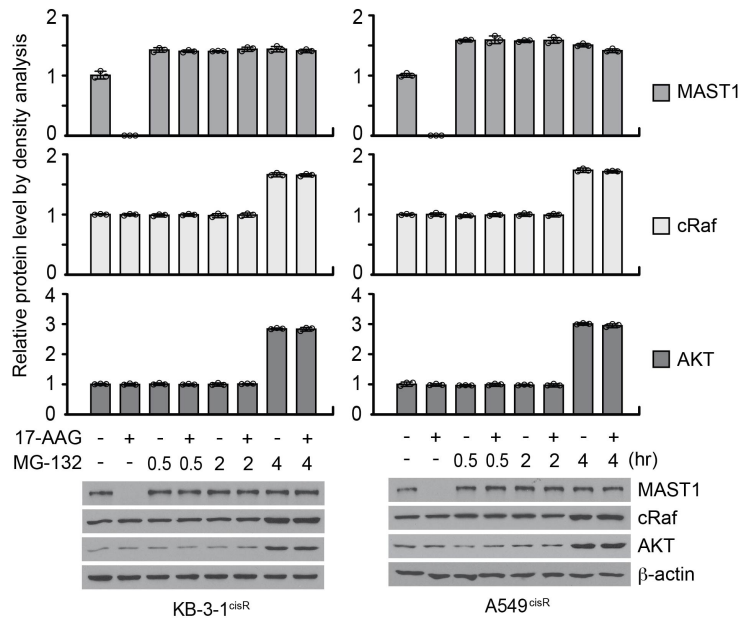

**Supplemental Figure 5. Proteasome inhibitor MG-132 stabilizes hsp90 client proteins MAST1, cRaf, and AKT but with different sensitivities.** 293T cells (A) or KB-3-1<sup>cisR</sup> and A549<sup>cisR</sup> cells (B) were treated with MG-132 (10  $\mu$ M) for the indicated times before the addition of 17-AAG (1  $\mu$ M) for 4 hours. Protein levels were determined by densitometry analysis. Data are mean  $\pm$  SD from three technical replicates and representative of two independent biological experiments.

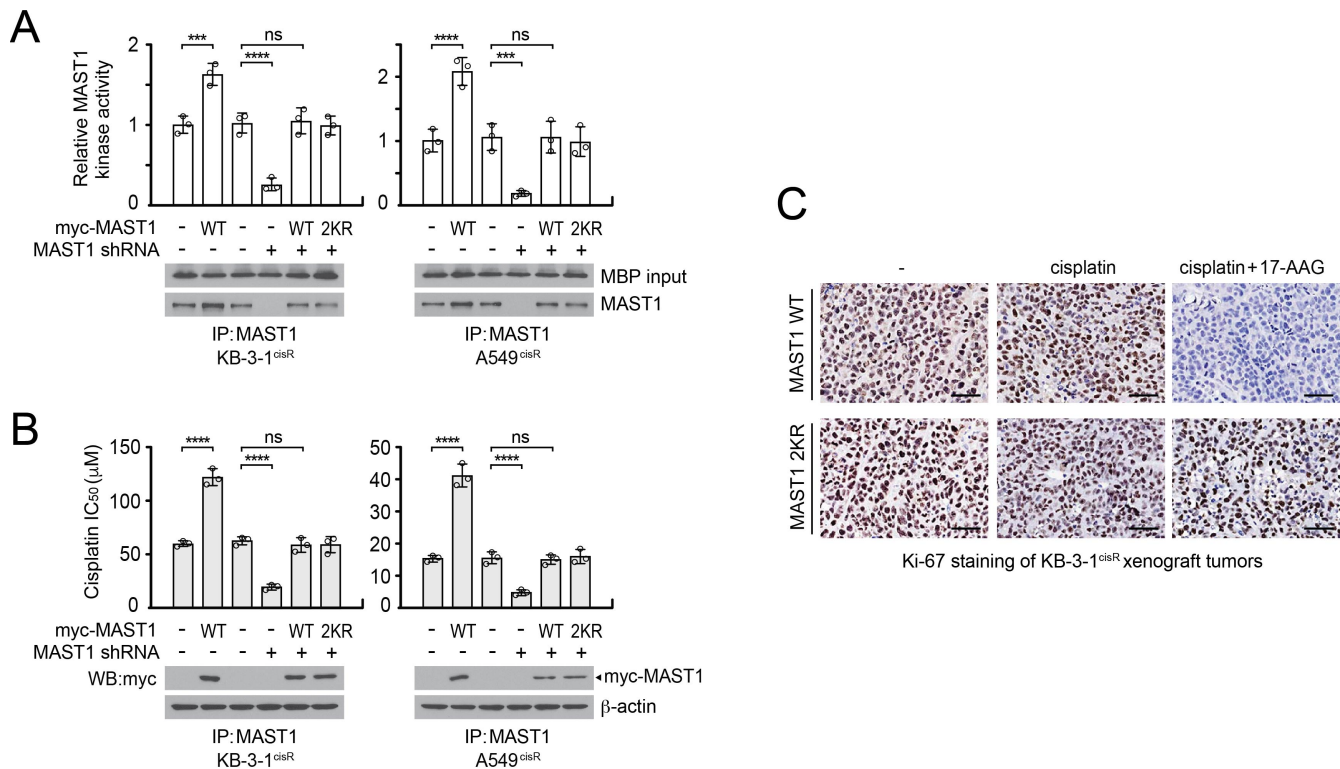

**Supplemental Figure 6. MAST1 protein level contributes to MAST1 activity, cisplatin resistance, and tumor proliferation. (A-B)** MAST1 kinase activity (A) and cisplatin IC<sub>50</sub> were determined in KB-3-1<sup>cisR</sup> and A549<sup>cisR</sup> cells with MAST1 modulation. MAST1 was enriched from cells by immunoprecipitation and MAST1 activity was assessed by ADP-Glo kinase assay using myelin basic protein (MBP) as a substrate. Cisplatin IC<sub>50</sub> was assessed by CellTiter Glo assay. **(C)** Effect of 17-AAG and MAST1 WT or 2KR expression on cisplatin-resistant tumor proliferation. Scale bars represent 50 μm. Data shown are representative of two independent biological experiments for (A)-(C) and are mean ± SD from three technical replicates for (A) and (B). Statistical analysis was performed by 1-way ANOVA (\*\*\* $P$ <0.005; \*\*\*\* $P$ <0.0001).



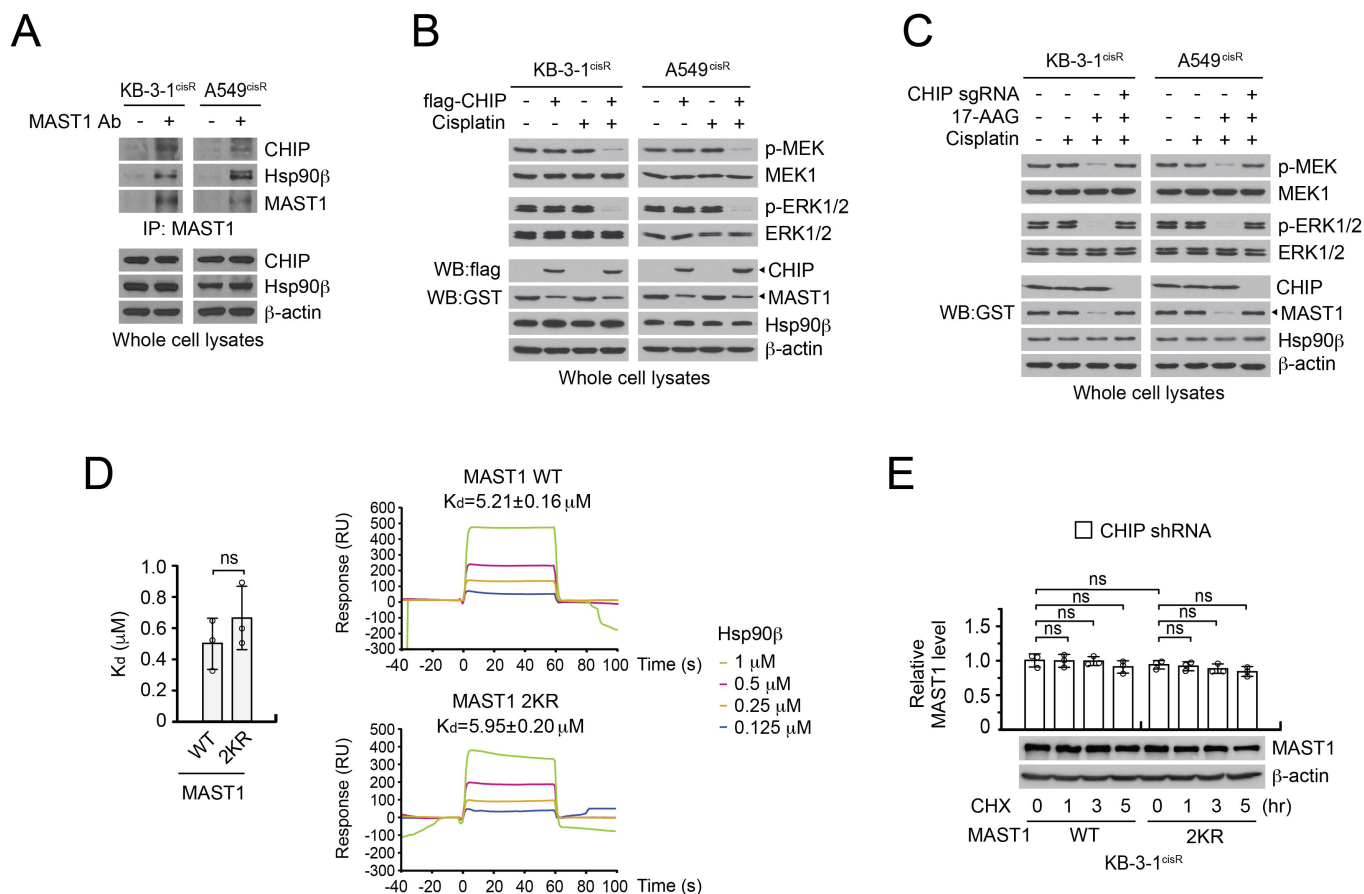

**Supplemental Figure 7. MAST1 interacts with CHIP and hsp90B.** (A) Endogenous interaction of CHIP, hsp90B, and MAST1 in cisplatin-resistant cancer cells. (B-C) Effect of CHIP overexpression (B) or knockout (C) on activation status of MAST1 downstream effectors, MEK1 and ERK1/2 in the presence or absence of cisplatin. Cells were treated with 5 mg/ml of cisplatin and 50 nM of 17-AAG for 48 hours. Activation of MEK1 and ERK1/2 was assessed by phosphorylation of MEK1 S217/S221 and ERK1/2 T202/Y204, respectively. (D) Interaction between MAST1 WT or 2KR and hsp90B was quantified by Biacore SPR analysis. Dissociation constants ( $K_d$ ) values for MAST1 WT-hsp90B or MAST1 2KR-hsp90B interaction are compared. (E) Protein stability of MAST1 WT or 2KR in CHIP knockdown cells. Cells with CHIP knockdown were treated with 5  $\mu$ g/ml cycloheximide (CHX) for the indicated times. Data shown are representative of two (A-D) and one (E) independent biological experiments. Data are mean  $\pm$  SD from three technical replicates for (E). Statistical analysis was performed by two-tailed student *t* test for (D) and 1-way ANOVA for (E).

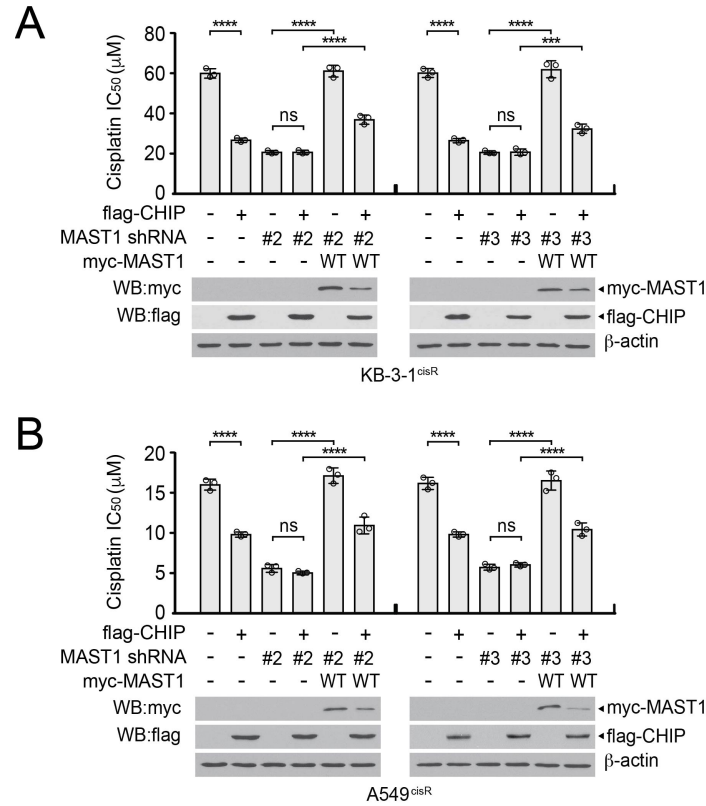

**Supplemental Figure 8. CHIP-mediated degradation of MAST1 sensitizes cisplatin-resistant cells to cisplatin.** Effect of MAST1 WT rescue expression on cisplatin sensitivity and MAST1 protein level in KB-3-1<sup>cisR</sup> (A) and A549<sup>cisR</sup> (B) cells with CHIP overexpression and MAST1 knockdown. Two distinct shRNA clones (#2 and #3) were used for MAST1 knockdown. Cells with flag-CHIP and MAST1 knockdown or WT overexpression were treated with increasing concentrations of cisplatin for 48 h. Cell viability was measured by CellTiter-Glo assay and cisplatin IC<sub>50</sub> was calculated using Graphpad Prism 8. Data are mean ± SD from three technical replicates and representative of three independent biological experiments for (A) and (B). Statistical analysis was performed by 1-way ANOVA (\*\**P* < 0.005; \*\*\*\**P* < 0.0001).



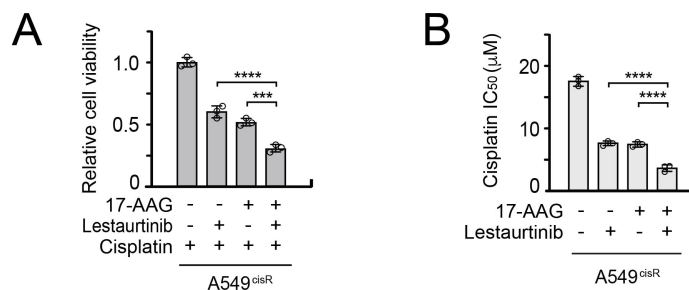

**Supplemental Figure 9. Cisplatin-resistant cell viability is further decreased by 17-AAG and lestaurtinib combination.** Effect of combinatorial treatment with 17-AAG and lestaurtinib on cell viability (A) and cisplatin sensitivity (B). A549<sup>cisR</sup> cells were treated with 17-AAG (100 nM) and lestaurtinib (100 nM) in the presence of sublethal dose of cisplatin (A549<sup>cisR</sup>: 2 μg/ml) for cell viability and increasing concentrations of cisplatin for IC<sub>50</sub> for 48 h. Cell viability and cisplatin IC<sub>50</sub> were assessed by trypan blue exclusion and CellTiter-Glo assay, respectively. Data are mean ± SD from three technical replicates and representative of three independent biological experiments (A) and from three biological replicates (B). Statistical analysis was performed by one-way ANOVA (\*\*\* $P$ <0.005; \*\*\*\* $P$ <0.0001).

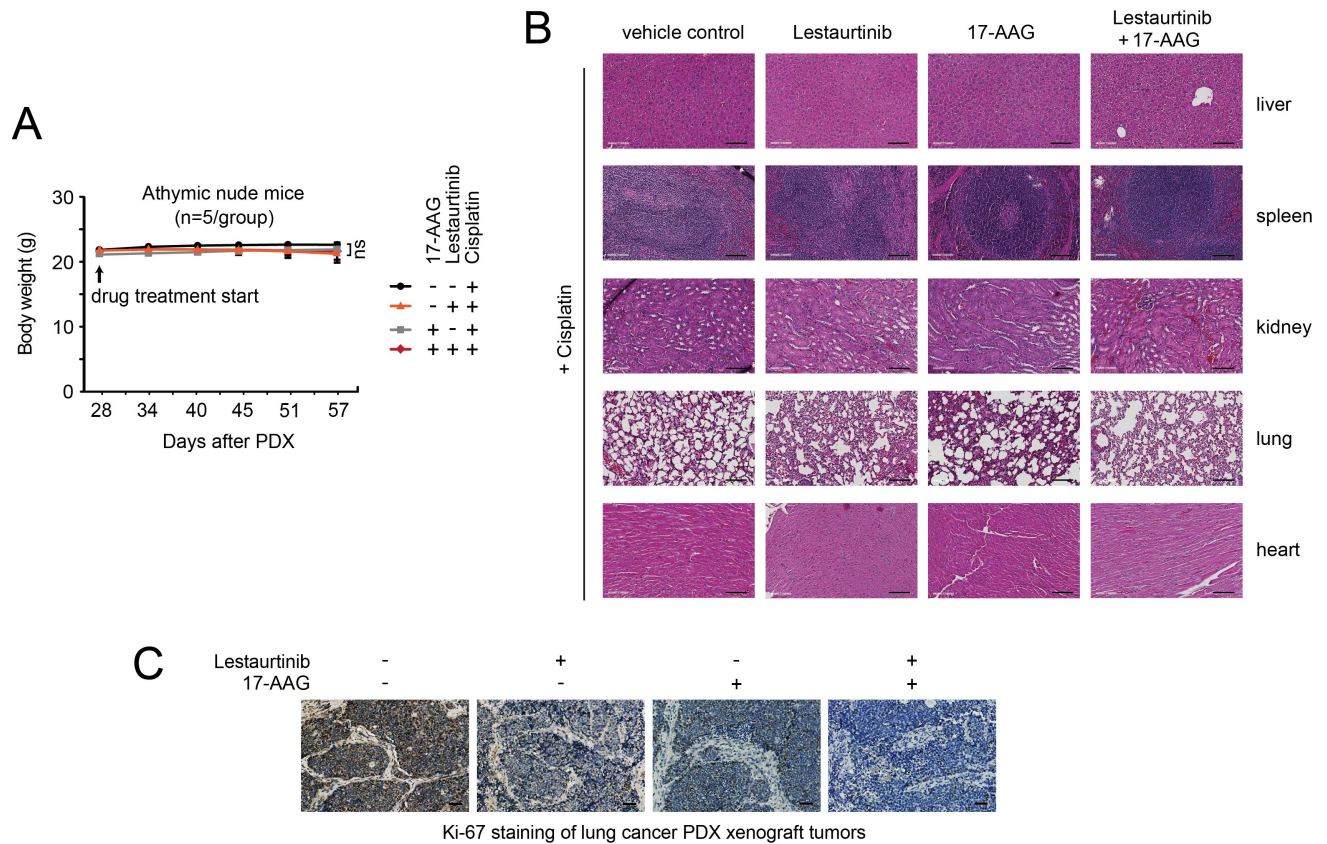

**Supplemental Figure 10. Body weight, organ histology, and tumor Ki-67 staining of mice treated with vehicle control, lestaurtinib, 17-AAG, and combination.** Nude mice were treated with cisplatin (5 mg/kg; intraperitoneal (i.p.) injection; twice a week), 17-AAG (50 mg/kg; i.p. injection; 5 times a week), and lestaurtinib (20 mg/kg; subcutaneous injection; 5 times a week) for 29 days. **(A)** Body weights were measured every 5-6 days during treatment. **(B)** Hematoxylin and eosin (H&E) stained tissue histology of representative mice are shown. Scale bars represent 50  $\mu$ m. **(C)** Effect of cisplatin treatment with the combination of 17-AAG and lestaurtinib on tumor proliferation of lung cancer PDX mice. Proliferation of the PDX tumors was assessed by Ki-67 IHC staining. Scale bars represent 50  $\mu$ m. n=5 mice/group. p values were determined by two-tailed Student's *t* test (ns: not significant). Data shown are representative of five biological replicates for (B) and (C).

|                         | 17-AAG [nM]         |                     | Lestaurtinib [nM]   |                     | 17-AAG [nM] + lestaurtinib [nM] |                        |                        |
|-------------------------|---------------------|---------------------|---------------------|---------------------|---------------------------------|------------------------|------------------------|
|                         | Dose                | Cytotoxicity effect | Dose                | Cytotoxicity effect | Dose                            | Fraction affected (Fa) | Combination Index (CI) |
| KB-3-1 <sup>cisR</sup>  | 25                  | 0.06412             | 25                  | 0.09275             | 12.5 + 12.5                     | 0.08448                | 1.00785                |
|                         | 50                  | 0.10472             | 50                  | 0.18320             | 25 + 25                         | 0.14512                | 1.24977                |
|                         | 100                 | 0.44943             | 100                 | 0.50224             | 50 + 50                         | 0.55370                | 0.53017                |
|                         | 200                 | 0.59323             | 200                 | 0.61555             | *100 + 100                      | 0.79001                | 0.44930                |
|                         | 300                 | 0.65571             | 300                 | 0.67830             | 150 + 150                       | 0.81391                | 0.59999                |
|                         | 400                 | 0.73818             | 400                 | 0.72470             | 200 + 200                       | 0.83597                | 0.71096                |
|                         | Dm: 170.92, r=0.977 |                     | Dm: 149.59, r=0.979 |                     | Dm: 114.10, r=0.976             |                        |                        |
| A549 <sup>cisR</sup>    | 25                  | 0.08017             | 25                  | 0.06475             | 12.5 + 12.5                     | 0.05225                | 1.79686                |
|                         | 50                  | 0.30879             | 50                  | 0.16201             | 25 + 25                         | 0.11486                | 1.77409                |
|                         | 100                 | 0.43312             | 100                 | 0.56839             | 50 + 50                         | 0.46330                | 0.74790                |
|                         | 200                 | 0.58744             | 200                 | 0.60056             | *100 + 100                      | 0.79268                | 0.44298                |
|                         | 300                 | 0.66111             | 300                 | 0.66574             | 150 + 150                       | 0.81730                | 0.58462                |
|                         | 400                 | 0.75193             | 400                 | 0.71908             | 200 + 200                       | 0.82872                | 0.73116                |
|                         | Dm: 146.65, r=0.975 |                     | Dm: 155.25, r=0.955 |                     | Dm: 127.90, r=0.981             |                        |                        |
| A2780 <sup>cisR</sup>   | 50                  | 0.09329             | 50                  | 0.07989             | 25 + 25                         | 0.05727                | 1.31982                |
|                         | 100                 | 0.19537             | 100                 | 0.19679             | 50 + 50                         | 0.16861                | 1.16717                |
|                         | 200                 | 0.38055             | 200                 | 0.42671             | 100 + 100                       | 0.44136                | 0.93085                |
|                         | 300                 | 0.57814             | 300                 | 0.59962             | 150 + 150                       | 0.63762                | 0.81304                |
|                         | 400                 | 0.64046             | 400                 | 0.65788             | *200 + 200                      | 0.74698                | 0.76447                |
|                         | 500                 | 0.72794             | 500                 | 0.75133             | 250 + 250                       | 0.78434                | 0.83014                |
|                         | Dm: 258.92, r=0.997 |                     | Dm: 245.31, r=0.999 |                     | Dm: 230.75, r=0.999             |                        |                        |
| PCI-15A <sup>cisR</sup> | 25                  | 0.07326             | 50                  | 0.07259             | 12.5 + 25                       | 0.09881                | 0.79795                |
|                         | 50                  | 0.17736             | 100                 | 0.19370             | 25 + 50                         | 0.18646                | 0.96851                |
|                         | 100                 | 0.37086             | 200                 | 0.33997             | 50 + 100                        | 0.47526                | 0.76451                |
|                         | 150                 | 0.56936             | 300                 | 0.51134             | *75 + 150                       | 0.67642                | 0.65164                |
|                         | 200                 | 0.65689             | 400                 | 0.58817             | 100 + 200                       | 0.69674                | 0.81515                |
|                         | 250                 | 0.71874             | 500                 | 0.69812             | 125 + 250                       | 0.73638                | 0.89299                |
|                         | Dm: 133.05, r=0.999 |                     | Dm: 294.81, r=0.997 |                     | Dm: 169.07, r=0.989             |                        |                        |

**Supplemental Table. 1. Synergistic combination of 17-AAG and lestaurtinib.** Dm: Median effect dose. Blue: Combination that resulted in synergism. \*Combination providing the lowest CI value in each cell line.
